# Supplementary material
Source: Springer Nature journal article supplement (https://www.springermedizin.de/resource/supplementary/13063_2008_296_MOESM3_ESM.pdf/9618082)
Supplement: MOESM3 [file 9618082]

# Evaluation of postoperative symptoms 12 months after surgery

Preoperative symptom

11-Point Symptom Score<sup>1)</sup>

Vaginal bleeding

Type : \_\_\_\_\_

Pelvic pain

Type : \_\_\_\_\_

Urologic symptom

Type : \_\_\_\_\_

Gastrointestinal symptom

Type : \_\_\_\_\_

Other symptoms

Type : \_\_\_\_\_

## 1) 11-Point Symptoms Score

: -5 (markedly worse) to +5 (marked better)

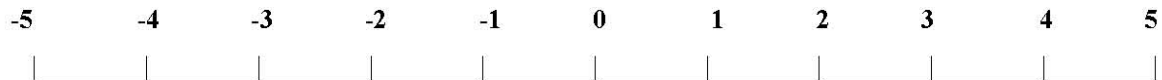

Markedly  
worse

No  
Change

Markedly  
better
